CORRECTION

# Correction: Biofilm Formation As a Response to Ecological Competition

Nuno M. Oliveira, Esteban Martinez-Garcia, Joao Xavier, William M. Durham, Roberto Kolter, Wook Kim, Kevin R. Foster

## Notice of Republication

This article was republished on July 24, 2015 to correct an error in the author byline and article citation. The first author's name was spelled incorrectly and should be: Nuno M. Oliveira. Please download this article again to view the correct version.

## Reference

1. Oliveira NM, Martinez-Garcia E, Xavier J, Durham WM, Kolter R, Kim W, et al. (2015) Biofilm Formation As a Response to Ecological Competition. PLoS Biol 13(7): e1002191. doi:[10.1371/journal.pbio.1002191](https://doi.org/10.1371/journal.pbio.1002191) PMID: [26158271](https://pubmed.ncbi.nlm.nih.gov/26158271/)

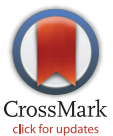

## OPEN ACCESS

**Citation:** Oliveira NM, Martinez-Garcia E, Xavier J, Durham WM, Kolter R, Kim W, et al. (2015)

Correction: Biofilm Formation As a Response to Ecological Competition. PLoS Biol 13(8): e1002232. doi:[10.1371/journal.pbio.1002232](https://doi.org/10.1371/journal.pbio.1002232)

**Published:** August 12, 2015

**Copyright:** © 2015 Oliveira et al. This is an open access article distributed under the terms of the [Creative Commons Attribution License](https://creativecommons.org/licenses/by/4.0/), which permits unrestricted use, distribution, and reproduction in any medium, provided the original author and source are credited.
